1 **Exploring Religious leaders' experiences and challenges on Childbirth at**  
2 **Health Institutions. A qualitative study**

3

4

5 **Authors**

6 Lakew Abebe<sup>1\*</sup>, Zewdie Birhanu<sup>1</sup>, Nicole Bergen<sup>3</sup>, Gebeyehu Bulcha<sup>2</sup>, Kunuz Haji<sup>2</sup>, Manisha

7 Kulkarni<sup>4</sup>, Jaameeta Kurji<sup>3</sup>, Mulumebet Abera<sup>5</sup>, Abebe Mamo<sup>1</sup>, Ronald Labonté<sup>4</sup>, Sudhakar

8 Morankar<sup>1</sup>

9 **Affiliation:**

10 <sup>1</sup>Department of Health, Behavior and Society, Faculty of Public Health, Jimma University,

11 Ethiopia;

12 <sup>2</sup>Jimma Zone Health Office, Jimma Zone, Oromia Region, Ethiopia

13 <sup>3</sup>Faculty of Health Sciences, University of Ottawa, Ottawa, Canada

14 <sup>4</sup>School of Epidemiology and Public Health, University of Ottawa, Ottawa, Canada

15 <sup>5</sup>Department of Population and Family Health, Faculty of Public Health, Jimma University,

16 Ethiopia

17 Corresponding Author: Lakew Abebe Gebretsadik\*

18 Email: [lakewgebretsadika9@gmail.com](mailto:lakewgebretsadika9@gmail.com); phone +251917823144;

19

20

21

22

23

24

25

26

27

28 **Abstract**

29 **Background:** *Childbirth at health institutions is critical to preventing major maternal and*  
30 *newborn deaths. In low and middle-income countries, many women still give childbirth without*  
31 *skilled assistance. Religious leaders may play a crucial role to promote childbirth at health*  
32 *institutions. So, this study aims to explore religious leaders' experiences and challenges in*  
33 *childbirth preparedness and childbirth at health institutions.*

34 **Methods:** *After ethical approval was secured from Jimma University, Ethiopia, and the*  
35 *University of Ottawa, Health Sciences and Research Ethics Boards, Canada an exploratory*  
36 *study was conducted from Nov 2016 to February 2017.*

37 *Data were collected from 24 religious leaders. Atlas ti software 7.5.18 package was used to*  
38 *assist the analysis. Identified themes and categories were interpreted and discussed with related*  
39 *studies.*

40 **Results:** *Lower awareness level, family needs for traditional birth rituals at home, lack of access*  
41 *to roads and transportation, lack of medical supplies, poor quality of health care provision and*  
42 *lack of respect for laboring mothers were the challenges raised by study participants. There was*  
43 *a traditional way of childbirth preparedness but is not matched due to economic status and level*  
44 *of awareness. The majority are inclined to say that destiny of maternal health outcome is*  
45 *determined by God/Allah's will though not contradicting childbirth at a health institution.*

46 **Conclusion:** *A comprehensive approach to include religious leaders to increase awareness and*  
47 *positive beliefs towards childbirth at health institutions should be considered. Health institution*  
48 *factors such as respect for laboring mothers, medical supplies, and equipment should be*  
49 *improved. Access to roads or transportation also needs to be communicated to responsible*  
50 *bodies and community leaders to improve transportation problems.*

51 **Key words:** *Religious leaders, maternal health, Ethiopia, Childbirth, Beliefs*

52

53 **Introduction**

54 Background: Maternal mortality rate remains high and continues to become a key challenge,  
55 especially in developing countries (1). It was reported that nearly 4.7 million mothers, newborns,  
56 and children were dying each year in sub-Saharan Africa. This shows that 11% of the world  
57 population is living in sub-Saharan Africa but more than 50% of the world's maternal, newborn,  
58 and child deaths occur in this region, (2 – 6).

59 In Ethiopia, MMR reduced from 871 per 100,000 live births in 2000 to 421 per 100,000 live  
60 births by 2016, (7-13). Another important maternal health service is ANC4<sup>+</sup> which is an  
61 antecedent in increasing the childbirth at health institutions that remains low (7).

62 Protection of human rights for maternal and newborn issues has been emphasized since 2012.

63 The Human Rights Council has called upon states to scale up efforts to achieve the integrated  
64 management of quality maternal, newborn, and child health services, particularly at community  
65 and family levels, (14,15). All UN countries including Ethiopia endorsed it and yet MMR  
66 remains high.

67 One of the reasons is childbirth preparedness and the low use of health institutions for childbirth,  
68 (16, 17). Childbirth at a health institution attended by skilled health professionals is vital in  
69 reducing maternal mortality, (18). Nevertheless, the use of healthcare services is influenced by  
70 the cultural milieu and religious affiliation in which one lives, (19). For example, religion seems  
71 to play a role in women's decisions to seek antenatal care, childbirth preparedness, and childbirth  
72 at health institutions, (20).

73 In Ethiopia, where 99% of the population are religious (i.e., Orthodox 43.8%, Muslim 31.3%,  
74 Protestant 22.8%, Catholic 0.7%, traditional 0.6%, and other 0.8%, (21), religious and cultural  
75 thoughts potentially have a strong influence on day to day lives of ordinary people. It may affect

76 their held concept of health, childbirth preparedness, and childbirth at the health institution.  
77 However, there are few studies available on the aspects of religious beliefs and held values on  
78 childbirth preparedness and childbirth at health institutions, (22-27). Thus, this study is to  
79 explore awareness, beliefs, practices, and challenges directly from religious leaders about  
80 themselves and their religious followers on childbirth preparedness and childbirth at the  
81 health institution.

## 82 **Assumption**

83 The conceptual framework is derived from the socio-cultural theoretical and religious  
84 orientation that provides supposition about how and why religion and social norms affect  
85 childbirth at the health institution. Norms, values, and beliefs spurred from the background  
86 of religious ideals and governing principles held for a longer period, (13, 28). These norms  
87 and beliefs potentially influence the values held on childbirth preparedness and delivery  
88 practice at the individual and group level. In the African context, religious and spiritual  
89 dimensions exist strongly and can play significant roles in terms of aligning modern medical  
90 care and service need. It is therefore possible that certain religious perspectives may  
91 encourage or discourage behaviors, including staying at MWH and childbirth at a health  
92 institution besides knowledge and attitudes on the service or behavior to be accomplished,  
93 (25).

## 94 **Methods and Materials**

### 95 **Study setting**

96 The study was conducted in Jimma Zone. It is one of the biggest zones of Oromia Regional  
97 states, Ethiopia, located 356 km to the Southwest of the capital city Addis Ababa, Ethiopia.  
98 Jimma Zone comprises 21 districts with an estimated population of 3.2 million and the majority

99 of the population resided in rural areas. Jimma zone is providing institutional delivery services  
100 using 05 hospitals and 120 primary health care units (PHCUs) (Jimma Zone Health Office report  
101 of 2018/9 unpublished). This study was conducted in three districts of 24 PHCUs with a high  
102 population size among other districts in the Zone catchment area.

### 103 **Study design**

104 Ethical approval was secured from Jimma University's Research Ethics Appraisal Board,  
105 Ethiopia, and the University of Ottawa (UoO) Health Sciences and Research Ethics Board,  
106 Canada. This exploratory case study was conducted as part of an overall baseline study of  
107 innovating maternal and child health in Africa (IMCHA) intervention project in Jimma Zone,  
108 Southwest Ethiopia in February 2017.

### 109 **Sample size and sampling technique**

110 Data collection involved in-depth interviews (IDIs). A total of twenty-four religious leaders  
111 were selected purposefully. The purpose was to have the highest expected numbers of religious  
112 followers within the study PHCUs. Accordingly, sample participants were 10, 8, and 6 in  
113 Gomma, Seka Chekorsa, and Seka districts respectively.

### 114 **Data collection procedure and Instrument**

115 The researchers developed the IDI guideline. The guideline covered questions on demographic  
116 information, roles, and responsibility, and guiding points on awareness, beliefs, existing  
117 practices, and challenges in childbirth preparedness and childbirth at a health institution. Ten  
118 data collectors with master's degree qualifications and at least one previous qualitative research  
119 data collection experience were recruited. Three days of training were given followed by a one-  
120 day field pretest. On actual data collection, two data collectors were deployed to guide an

121 interview while the other one recorded the interview using an audio recorder. Such five data  
122 collection teams were supervised by a senior qualitative expert.

123 **Definition of terms:**

124 **Childbirth at a health institution:** This is childbirth managed by a midwife or gynecologist at  
125 HC or hospital.

126 **Childbirth Preparedness:** the process of planning for normal birth. But it is also said birth  
127 preparedness and complication readiness which is defined as the process of planning for normal  
128 birth and anticipating actions needed in case of emergency.

129 **Health Center (HC):** this is a health institution where there is at least a midwife to manage  
130 laboring mothers

131 **Primary health care unit (PHCU):** this is a health system that has a health center and at least  
132 five satellite health posts under it.

133 **Data analysis**

134 Audio-recorded data were transcribed and translated into English by qualitative researchers.  
135 The transcriptions were read line by line by another researcher while listening to the audio. If  
136 there was identified disagreement on audio and transcription by the second researcher, it was  
137 discussed with the primary transcriber and corrected. If the disagreement was not solved yet, a  
138 third qualitative researcher was invited to judge. Encrypted 24 qualitative word documents were  
139 sent to the Canadian research team members, based at the University of Ottawa and a codebook  
140 and codes were developed. The codebook and codes were sent to the JU researchers for review.  
141 Through communication few additional codes were added and appraised by both UoO and JU  
142 research teams. Documents were uploaded on Atlas ti software 7.5.18 package to assist the  
143 analysis. Identified codes and categories were cross-checked by another qualitative researcher for

144 consistency. The final findings were presented thematically with respective quotes, discussed  
145 with other similar studies, and conclusions are drawn.

## 146 **Results**

### 147 *Socio-demographic characteristics of the respondents*

148 All study participants were male. The mean age was 45, (range 30 to 70), year-old. As a  
149 religious leader, the average service year was 12.6, (range 1.5 - 30), year-old.

150 Four out of 24 study participants were Christian while the rest are Islam by religion, (See table  
151 1).

### 152 **Themes Identified**

153 The main themes identified are religious leaders' awareness, beliefs, Experience in childbirth  
154 Preparedness, practices, and challenges stated by religious leaders on childbirth services  
155 utilization at health institutions.

#### 156 **1. Religious leaders' awareness**

157 The importance of creating pregnant mothers' knowledge was underlined by most study  
158 participants. They emphasized medical checkup during the pregnancy period is vital to get health  
159 advice when health problem happens.

160 *"ANC is important. It helps to prevent pregnancy-related risks. For instance, if a woman suffers  
161 due to high blood pressure or anemia, she can get advice and treatment from a health provider"*  
162 *(#P10 Gomma District)*

163 *"...currently health providers at PHCUs and health post (HP) disseminate health information.  
164 Due to this endeavor community gains improved awareness on the use of childbirth at health  
165 institution". (P#15, Kersa District)*

166 Further, childbirth at a health institution is found important to stop heavy bleeding if it happens  
167 while a mother is in childbirth. Health information is likewise to be better accessible and diffused  
168 through discussion among community members nowadays.

169 *“When a woman gives childbirth at health institution implies heavy vaginal bleeding is going to*  
170 *be controlled” (# P13 Kersa District)*

171 *“..., elderlies and the community members discuss among themselves and advise pregnant*  
172 *mothers to go to the health center for childbirth service.” (P#11, Gomma District)*

## 173 **2. Religious leaders’ beliefs**

174 Religious leaders supposed that God/Allah appointed health professionals who are responsible  
175 for religious followers' health. Thus, pregnant women visit health institutions if they consider a  
176 health professional as a messenger sent from God/Allah to their health.

177 *“There is no contradiction to use health institution as a place of childbirth but lack of truth and*  
178 *knowledge matters”. (#P2 Gomma District)*

179 *“There are village structures, called ‘garee’ . Through these structures, women and families are*  
180 *enforced to go to health check-up or health examination to the nearest health institution.” (P#1*  
181 *Gomma district)*

182 Most study participants described religious followers' moral values are integral to religious  
183 beliefs. Among, those moral beliefs, neatness, and support for women are important ones. One  
184 can use this concept to mobilize religious followers in assisting pregnant women to use health  
185 services.

186 *“Since our Allah is good for us, Allah needs a good thing from us too. Women are the gift given*  
187 *to men from Allah and strongly need men’s support. Our religion is not contradicting rather*  
188 *supporting on women having to get health services”. (P#18, Kersa district)*



189 *"From our religion perspective health starts from keeping one's neatness. After ensuring one's*  
190 *neatness we can proceed to spirituality". Women have also great roles in nurturing and giving*  
191 *secure attachment to their children and their husbands together. We have been transferring this*  
192 *information to religious followers but not detail benefits of MNCH." (P#5, Gomma district)*

193 Contrarily, the consensus by study participants showed that to be healthy or not is determined by  
194 God or Allah.

195 *"The healer is God. For example, if I'm sick and 'oral' medicine is prescribed to me and*  
196 *whether I swallow the medicine or not, the cure to me comes from God/Allah. So, I respect the*  
197 *rule and take the medicine. The rule shall work for a pregnant woman's health too". (#P4,*  
198 *Gamma, Choche PHCU, Gomma)*

199 There was also a positive belief towards having rest and avoidance of heavy work during the  
200 pregnancy period. In addition, living in peace with her husband is found as equally important to  
201 her as other necessities.

202 *"In our religion, a pregnant woman is considered as weak and needs support from her husband*  
203 *and family. Her food needs to be nourishing. To get enough rest, her resting place should be*  
204 *prepared. She has to be protected from heavy-duty". (#P15 Kersa District)*

205 *"The priority is having peace with her husband [through love approach]. They should say my*  
206 *husband or my dearly and my love If so, the husband encourages his wife and pay her medical*  
207 *bills. His wife also gets interested in further discussion openly with her husband and health*  
208 *extension worker."(P#19 Seka District)*

209 Theme 2: Experience or practice of Religious Leaders regarding Childbirth at Health Institution

### 210 **3. Experience in childbirth Preparedness**

211 Childbirth preparedness and complication readiness are defined as the process of planning for  
212 normal birth and anticipating actions needed in case of emergency. This is the most important  
213 factor in childbirth at the health institution. Most study participants mentioned they had a better  
214 experience in providing health information and advice to their followers, but often on  
215 environmental hygiene and HIV/AIDS topics but not on maternal and child health  
216 *"Those who accept childbirth at health institution were the ones who were advised by a religious*  
217 *leader than who was advised by a health provider or village/'kebele'/ leader. Anything believed*  
218 *by a religious leader can also be believed and accepted by religious followers."* (P#13-Seka  
219 *District)*  
220 *Washing clothes and preparing food items were the common practices performed by a woman or*  
221 *her husbands and family members before childbirth.*  
222 *"When delivery period approached, a pregnant woman washes all her delivery time clothes.*  
223 *When child labor pain starts; she informs family or neighbor to be taken to health center".* (P#3,  
224 *Gomma District)*  
225 *"A Pregnant mother and family members wash clothes, beds, and insecticidal bed net for*  
226 *protecting the infants from mosquito bites after birth. A woman is concerned with the health of*  
227 *her new baby and herself. ".* (P#11, *Gomma District)*  
228 "A pregnant mother together with her husband or other family member prepares food items. A  
229 very common kind of food item prepared for childbirth is the powder for porridge and soup,  
230 butter, and 'kocho'. (P#19, Seka Chekorsa District)  
231 Almost all study participants had visited MWHs at least once before the study period. They  
232 observed whether the women were using it or not and attempted to know why a pregnant woman  
233 used MWH

234 *"...there were women nearby who had stayed there some days. Some women do not know their*  
235 *child-birth period but wait for it only. There were pregnant mothers brought by ambulance*  
236 *service to health center during active child labor time as well". (P#3, Gomma District)*

237 Regarding the birthplace decision-making of their religious followers, they underlined that  
238 woman herself was the first decision-maker followed by her husband. They further stated there  
239 were couples where husbands still had the upper hand to decide where to give childbirth because  
240 of their economic power.

241 *"The one who makes the final decision is the woman herself. Nevertheless, the decision on*  
242 *money, transportation means, food items, and clothes falls to her husband. Thus, in practice, the*  
243 *final decision of a woman is approved by her husband for economic and other social support."*  
244 *(P#2- Gomma District)*

#### 245 **4. Practice or Experience in childbirth at a health institution**

246 As highlighted by RLs, the presence of good service at health institutions is found another  
247 important aspect. Others such as the presence of ambulance service and continuous awareness  
248 rising were considered to be central to childbirth preparation and the decision to give CBHI:

249 *"Previously, giving birth at health centers was considered as a shameful practice. But currently,*  
250 *it has been accepted" (P#9, Gomma District)*

251 *"She may ask other women who had the experience of giving birth at health institutions. She*  
252 *sought information by asking how the staff assisted her, whether she gave birth without problem*  
253 *or not, whether they served her with dignity or not, and so on. After she got such information,*  
254 *she decided to go to the health institution or not." P#21, Seka chekorsa District*

255 Some study participants stated that they had a good experience in providing advice and  
256 information to their followers to have health services from nearby health institutions. They  
257 mentioned that most religious followers prefer using health institution delivery at present time:

258 *“Nothing prevents pregnant women from getting childbirth health services at the health*  
259 *institution. The reason is that we are giving advice together with health service providers on*  
260 *when and where a pregnant mother gets childbirth services”. (P#5, Gomma District)*

261 Some religious followers or community members have formulated a local verdict indicating  
262 that if someone gives childbirth at home, her or her husband might be punished:

263 *“There is punishment to be passed from a range of 150 to 200 ETB or \$ 4.5 to \$ 6.0 when a*  
264 *mother gives birth at home. For example ‘Kera Budo has around 46 “Garees/sub-villages/” and*  
265 *each Garees has its leader. Garee leader follows a woman not to deliver at home. In the case of*  
266 *home delivery practice, the village leader makes her or her husband penalized. Because of this*  
267 *everybody is alerted to use childbirth service at health institution”. (P#22 Seka chekorsa*  
268 *District)*

## 269 **5. Challenges to Childbirth at Health Institution**

270 On points rose on why some women do not prepare the necessary materials and items during  
271 childbirth preparedness and childbirth? Study participants mentioned the following main points:  
272 awareness gap, religious and traditional beliefs, lack of support, disagreement with family and  
273 husbands, poor economic status, and lack of community-level scheme or support. There were  
274 many points raised on the health system or supply side as well. Health professionals are not  
275 friendly or don't have the competency to fit with the mother's needs; medical supplies were not  
276 often available at government health institutions when needed and no system of checking or

277 monitoring how the contributed money or 'community funding' for MWHs was utilized were  
278 mentioned among many other points.

279 **Awareness gaps**

280 Being a patriarchal society, a husband could monitor the progress of the pregnancy and  
281 supported his wife to visit a health center during the period of pregnancy and take her to the  
282 health center to give childbirth there. But great numbers of husbands do not do that. This is  
283 mainly associated with a lack of clear awareness and supportive health institution space while the  
284 woman undergoes getting health services.

285 *"There were pregnant women who gave childbirths on the roadside when they went to*  
286 *somewhere such as market place. This is mainly due to a lack of ahead of childbirth*  
287 *preparedness. Discussing and preparing what is needed is very limited." P#20, Seka Chekorsa*  
288 *District*

289 Another study participant stated many women do not know their last menstrual period or birth  
290 dates so do not able to estimate the expected date of delivery (EDD). As a result, most of them  
291 visit health institutions only when child labor starts.

292 *"Many women are not able to guess or estimate the time when they give childbirth. So, they don't*  
293 *prepare either for what they can eat and drink after they give childbirth or going to a health*  
294 *institution." (P#12 Seka Chekorsa District)*

295 Childbirth preparedness is mentioned as a secret activity by other study participants. This is  
296 mainly due to fear of punishment by village ('kebele') leaders or health decision makers' or  
297 health service providers.

298 *"Some women even need to hide their pregnancy and home childbirth practice. This is because*  
299 *of fear of criticism or 'social sanction' or financial punishment decreed by the respective village*  
300 *council."*

### 301 **Religious Beliefs and social norms as challenges**

302 Religious leaders admitted that preparedness for childbirth, like saving money and birthplace  
303 preference were not addressed or practiced positively. This is not only due to a lack of awareness  
304 but also due to traditional beliefs.

305 "Before the baby is born buying clothes for it is considered traumatic in case it is not born alive.  
306 So, the husband himself does not think about saving money for this purpose but rather giving his  
307 own hands to Allah's/God's will." P#12 Seka District

308 Some religious leaders also emphasized not being willing to advise couples to get childbirth at  
309 the health institution:

310 "I have no reason to advise them to go to the health institution; I teach them to pray to the healer  
311 God. If they believe in God from within heart they will be cured of any health problems  
312 including pregnancy and childbirth-related problems". #P1 Gomma District

313 *"There are women who think giving birth is predetermined by the will of Allah. Our Allah says*  
314 *that when you protect yourself, I will protect you". The one who give a healthy child is*  
315 *Rabbi/Allah". (#P2 Gomma District)*

316 Asked about their beliefs on the use of MWHs, some participants generally spoke favorably  
317 about the services that they received from the maternal waiting homes and they stayed without  
318 any complaints. Religious leaders described the challenge related to cultural beliefs on maternal  
319 waiting homes:

320 *"In our community, a woman staying out of her home is not our culture. If she has children at*  
321 *home can't stay without them for a week or two. In addition, culturally it is not supported for a*  
322 *woman to stay away from her husband and family so long." (#P15 Kersa District)*

323 *"No, it is not necessary for all-term pregnant mothers to stay at MWH. To stay at MWH a*  
324 *pregnant mother need to have any pregnancy-related health problem. ( #P17 Kersa District)*

325 Successful' home deliveries in the past contribute to an unwillingness to prefer childbirth at a  
326 health institution.

327 *"Previous time normal childbirth at home dictates to have home delivery to the current one. In*  
328 *addition, the need to have traditional rituals, which is not available at health institutions,*  
329 *discourages a woman to have childbirth at the health institution." (P#24 Seka-Chekorsa district)*

### 330 **Health Institution factors**

331 Poor quality health service provision is complained about by all religious leaders. Health  
332 providers seem to fail to convince and build trust in the users. For example, those who  
333 experienced poor quality service provision can be a negative motivator to their neighbors to go  
334 and gave childbirth at the health institutions other times.

335 "The going for childbirth at health institution is attributable to fear of punishment by the 'kebele'  
336 administrator. However, when we were born in previous times, our mothers were not going to  
337 health centers but they had been giving childbirth at home. But currently, it is a situation that  
338 comes after time passed and 'kebele' administrator and health provider are forcing people to go to  
339 the health institutions for childbirth." #P24 Seka Chekorsa District

340 As many study participants reported, It had been particularly difficult to get an ambulance if a  
341 HEW was not present anytime at the health post when laboring mothers came. Because of this

342 pregnant women were not referred to health institutions to give childbirth when child labor  
343 started.

344 "Since ambulance comes through HEW phone call to the next level, a HEW has to be nearby  
345 health post (HP) when an active laboring woman comes. But, I remember when a woman had  
346 traveled to HP but HEW was absent at that time. Due to this, the woman went back to her home  
347 and gave childbirth at home". #P13 Seka district

348 Religious leaders believed that mothers can get health services from health facilities properly if  
349 there are skilled and adequate numbers of health professionals.

350 *"To tell you the truth there are no adequate and competent health providers (doctors and*  
351 *nurses). There should be female providers but contrary to this a male midwife is assigned."*  
352 *(P#19 Seka-chekorsa District)*

353 They spoke about reasons discouraging women from using MWHs and childbirth at a health  
354 institution. There is a lack of trust due to the absence of proper advice by health professionals

355 *"I knew a woman who had been waiting for a week at MWH and later informed her she was not*  
356 *at term and she had to stay at her home. But, the woman was giving childbirth after she returned*  
357 *to her home on that day. After this occasion, all neighbors started to talk about service*  
358 *providers. They claimed as service providers know nothing". #P13 Seka District.*

359 Lack of Medical Supplies and equipment was mentioned as a challenge. Medical supplies when  
360 needed unavailable at all, particularly in rural health centers and health posts.

361 *"Pregnant women are observed to visit frequently this health post. They frequently come and*  
362 *examined here but I don't think that the health post has full equipment here".. (P#1 Gomma*  
363 *District)*



364 *"Light and medical instruments like laboratory equipment are the main hindrance in our*  
365 *community to get adequate services for maternity and children's health."* (P#6 Gomma District)

### 366 **Environmental factor**

367 As an environmental factor, participants repeatedly underscored poor road access to rural village  
368 settlers as a major challenge towards childbirth at a health institution.

369 *"Especially during the rainy season, because of uncomfortable roads and bridges for*  
370 *transportation, mothers are not able to go to give childbirth at the health institution. The only*  
371 *option is to give birth at home when it happens". #6 Gomma District*

### 372 **Discussion**

373 This study explored religious leaders' awareness, beliefs, and practices on the use and benefits of  
374 childbirth preparedness (CBP) and Childbirth at health institutions (CBHI). It further tried to  
375 identify challenges in CBP and CBHI.

376 Religious leaders stressed the need to raise the demand side towards health-seeking behaviors.

377 They gave due emphasis that awareness level was found deficient both among the religious  
378 leaders and their followers. It is further said that their followers had remained passive recipients  
379 of health care services. Similar study findings also showed access to information is deficient  
380 though there are actors and these actors said they were found playing important roles (29).

381 Health care provision was accepted positively in most cases. Because they believed it was from  
382 God/Allah not attributed to anyone. Another study also stated that such religious practices and  
383 beliefs were associated with many aspects of follower's life and need to study carefully and  
384 continuously with the changing beliefs of followers and religious leaders, (30). Again, other  
385 extensive quantitative research review findings emphasized the need to integrate spirituality and  
386 religious values into patient care, (27), including laboring mothers and their families.

387 Cultural beliefs and norms spurred from religious viewpoints were found indistinguishable  
388 influencers. Those beliefs and norms further diminished women's trust in health care services  
389 offered by health professionals. This finding is found analogous to the study findings in most  
390 African countries on similar issues (31-35). This is also found analogous to a study of a  
391 secondary analysis from cross-cultural phenomenological studies that asserts childbearing as a  
392 spiritually transforming phenomenon or experience (36). Therefore, childbearing, childbirth, and  
393 care can be established deeply tied to religious beliefs. In the case of the present study, the all-  
394 encompassing script and gesture showed implicit rejection of childbirth at the health institution.  
395 This was noted that almost all participants stated that "the final result of childbirth is determined  
396 by God/Allah's will".

397 Previous good experiences of childbirth at health institutions by neighborhoods positively  
398 influence childbirth practices at the health institution. This is supported by other studies in sub-  
399 Saharan African countries which indicated knowledge of birth preparedness and practice  
400 influences the use of childbirth at health institutions (37, 38).

401 The availability of better awareness-raising activities on the benefits of childbirth at health  
402 institutions positively influences childbirth practices. This finding is supported by other studies,  
403 (37-39). Religious leaders commended the presence of HEWs in each health post is vital to be  
404 consulted when childbirth begins. However, the quality of information and awareness-raising  
405 activities were not aligned with existing cultural norms. This finding is supported by previous  
406 studies on the roles of actors to promote maternal and child health [37, 38]. Another study also  
407 showed health extension workers are accepted by the community, (40).

408 The service quality of maternal health services could be jeopardized by a lack of ethical  
409 standards on service provision. Often health providers do not provide childbirth services with

410 respect. These findings correspond with the findings of other studies in Africa (15, 32, 41-44).  
411 According to RLs, health providers do not support the held social norms and values but only  
412 their professional knowledge and skills. In most rural areas the capability of health providers is  
413 low level and exhibits a poor quality of health care services during childbirth at the health  
414 institution. These findings matched with the findings of other studies in Tanzania and Ghana  
415 where access to quality healthcare remained a major challenge in the efforts at reversing  
416 maternal morbidity and mortality yet (41-44). In addition, when an emergency case happens, a  
417 mother in child labor was referred from PHCU to the nearest hospital. But, later on, there was no  
418 feedback mechanism from that hospital to the PHCU. So, the outcome of the emergency referred  
419 case was not known or documented by referee PHCU. There were gaps in the health information  
420 system and reporting. This finding is also supported by other studies (45, 46).  
421 Only term pregnant mothers were using MWH services and religious leaders were not supporting  
422 their existing tradition. They said, "*In our community, a woman staying out of her home is not*  
423 *endorsed*". This is found similar to a study done in Ghana where Muslim women experienced  
424 difficulties in using skilled care due to a religious obligation to keep the body unexposed to  
425 another person, (31). When the mother stayed at MWH for one to two weeks, which day of the  
426 week she gives childbirth is not exactly estimated with our current estimation mechanism of  
427 EDD. After a few hours of transfer from MWH to the delivery room, an emergency may happen  
428 at any time or a medical supply may be needed. Thus, husband or family support is critical but  
429 there is no room for her relatives to stay together with her. This study finding corresponds to the  
430 study done on fistula survivors in Addis Ababa, Ethiopia, (40). Other studies also showed  
431 inequality in access and use of MWHs determined by distance and level of community  
432 engagement within respective MWH catchment areas, (47-50).

433 Lack of medical supplies and equipment were found scarce and sometimes unavailable at all was  
434 mentioned unequivocally by all study participants. Childbirth at government health institutions is  
435 free of out-of-pocket payment, but the availability of medical supplies and emergency drugs was  
436 minimal or nil. As a result, often time prescriptions were sent out to the outside pharmacies. For  
437 those outside pharmacy prescriptions or medical supplies, some close family member is needed  
438 for the mother who is in childbirth at a health institution. This finding relates to another recent  
439 study in Ethiopia that revealed a majority of health institutions did not meet the national maternal  
440 and newborn health (MNH) quality of care standards mainly due to the lack of essential drugs  
441 and manpower, (51)

442 Access to roads, particularly during rainy seasons is a barrier to getting transportation from rural  
443 settings of the country to PHCU or hospital. Rural women in need of childbirth cannot reach  
444 timely at PHCU or may give birth at home or roadside while on travel. Religious leaders  
445 complained that most mothers were taken to health institutions after they tried for longer hours at  
446 home. But, this was counted as institutional delivery even though prolonged labor hours elapsed.  
447 Because of counting such figures as childbirth at health institutions, there might be a false boost  
448 of improved childbirth service utilization rate in Ethiopia (52). Such prolonged childbirth or  
449 labor, being counted as safe delivery, might have negative health outcomes for the mother and/or  
450 newborn. This is similar to three prominent gaps identified in the sub-Saharan African countries'  
451 MNCH service provision. These were coverage, equity, and quality of the provision of the  
452 services [7].

453 **Trustworthiness**

454 The training was given to all data collectors in collaboration with the UoO professors. All data  
455 collectors speak local languages fluently. Data collectors are also 2<sup>nd</sup> degree (MSc) level of  
456 academic rank. Every transcription was checked by two researchers against the audio records.

457 **Strength and Limitation**

458 As to the strength of the study, it was designed by senior researchers from the University of  
459 Ottawa, Canada, and Jimma University, Ethiopia as well as the implementing partners.  
460 Therefore, research experience and being multi-disciplinary research team members were acted.  
461 The research team involves researchers who can speak the local language as well as know the  
462 cultural norms and religious aspects.

463 As to the limitation of the study, there might be terminologies or words which might have  
464 different meanings and may give meanings other than the extraction of the final findings while  
465 preparing the manuscript. To counteract this limitation, the helping document was sent to all  
466 authors to check while reviewing the manuscript. On top of this, there might be social  
467 desirability bias or '*Political desirability bias*'. To minimize the limitation, the data collectors  
468 explained and take only informal consent and the respective personal identifiers were  
469 unrecorded. After a detailed explanation of the purpose to each of the study participants and only  
470 agreed to participate that the data collection was done.

471 **Conclusion:** the power to mobilize followers on held beliefs and practices by religious leaders is  
472 vital and needs to design a comprehensive approach to include religious leaders to increase the  
473 endeavors to create awareness and beliefs towards childbirth at health institutions should be  
474 considered. Health institution factors such as respect to laboring mothers, delivery, and access to  
475 medical supplies and equipment should be improved. Access to roads and transportation also

476 needs to be communicated to responsible bodies and community leaders to improve  
477 transportation problems.

#### 478 **Additional file**

479 English version questionnaire: English language questionnaire that used to assess awareness,  
480 beliefs, norms, practices of religious leaders is attached

#### 481 **List of abbreviations**

482 AIDS- Acquired Immuno-deficiency syndrome; ANC- antenatal care; CB- Childbirth; CBP-  
483 Childbirth Preparedness; CBHI- Childbirth at Health Institution; EDD- estimated date of  
484 delivery; FGD- focus group discussion; FMOH- Federal Ministry of Health; HEW- Health  
485 Extension Worker; HC- Health Centre; HI- Health institution; HIV- Human immuno-deficiency  
486 virus; HP- Health Post; IDI- in depth interview; IEC- information, education and  
487 communication; JZHO- Jimma Zone Health Office; JU- Jimma University; MDA- Male  
488 Development Army; MNCH- Maternal, newborn and child health; MWH- Maternity waiting  
489 Home; PHCU- Primary Health Care Unit; PNC- postnatal care; RL- religious leader; CBHI-  
490 CHILDBIRTH AT HEALTH INSTITUTION; SBA- Skilled Birth Attendance; UoO- University  
491 of Ottawa; WDA- Women Development Army ZHO- Zone Health Office

#### 492 **Acknowledgement**

493 This work was carried out with the aid of a grant from the Innovating for Maternal and Child  
494 Health in Africa initiative – a partnership of Global Affairs Canada (GAC), the Canadian  
495 Institutes of Health Research (CIHR) and Canada’s International Development Research Centre  
496 (IDRC).

#### 497 **Funding**

498 The Safe Motherhood Project is carried out by grants #108028–001 (Jimma University) and  
499 #108028–002 (University of Ottawa) from the Innovating for Maternal and Child Health in

500 Africa initiative, which is co-funded by Global Affairs Canada, Canadian Institutes for Health  
501 Research, and Canada's International Development Research Centre. The study does not  
502 necessarily reflect the opinions of these organizations. The funding bodies having no  
503 involvement in the analysis or in writing the article.

#### 504 **Availability of data and materials**

505 When the ethics statement was obtained from each religious institutions and informal consent  
506 from each participants, we have agreed not to publish the raw data retrieved from the information  
507 of the religious leaders. However, the datasets collected and analyzed for the current study is  
508 available from the corresponding author on a reasonable request.

#### 509 **Authors Contribution**

510 LA, MK, SM, and RL made substantial contributions to the implementation study design. GB,  
511 NB, SA, and AM, were involved in data acquisition, analysis and interpretation. LA, AM, SA  
512 drafted the manuscript and contributed to subsequent revisions. KB, SA, AM, GK, JK, SM, LA,  
513 MK and ZB critically reviewed the manuscript and provided feedback. All authors have read and  
514 approved the manuscript.

#### 515 **Authors' details**

516 <sup>1</sup>Department of Health, Behavior and Society, Faculty of Public Health, Jimma University,  
517 Ethiopia;

518 <sup>2</sup>Jimma Zone Health Office, Jimma Zone, Oromia Region, Ethiopia

519 <sup>3</sup>Faculty of Health Sciences, University of Ottawa, Ottawa, Canada

520 <sup>4</sup>School of Epidemiology and Public Health, University of Ottawa, Ottawa, Canada

521 <sup>5</sup>Department of Population and Family Health, Faculty of Public Health, Jimma University,  
522 Ethiopia

523 **Reference**

- 524 1. Kahissay, M.H., Fenta, T.G. & Boon, H. Religion, Spirits, Human Agents and Healing: A  
525 Conceptual Understanding from a Sociocultural Study of Tehuledere Community,  
526 Northeastern Ethiopia. *J Relig Health* 59, 946–960 (2020). [https://doi.org/10.1007/s10943-](https://doi.org/10.1007/s10943-018-0728-6)  
527 [018-0728-6](https://doi.org/10.1007/s10943-018-0728-6).
- 528 2. UNICEF. *State of the World’s Children 2010*. New York: UNICEF, 2009
- 529 3. WHO, UNICEF, UNFPA, the World Bank: *Trends In Maternal Mortality: 1990 to 2010*.  
530 Geneva: WHO; 2012.
- 531 4. UN Inter-agency Group for Child Mortality Estimation: *Levels & Trends in Child Mortality*.  
532 New York: UNICEF; 2013.
- 533 5. Kinney MV, Kerber KJ, Black RE, Cohen B, Nkrumah F, Coovadia H, Nampala PM, Lawn  
534 JE, Axelson H, Bergh AM, Chopra M, Diab R, Friberg I, Odubanjo O, Walker N, Weissman  
535 E: Sub-Saharan Africa’s mothers, newborns, and children: where and why do they die? *PLoS*  
536 *Med* 2010, 7(6):e1000294
- 537 6. Friberg IK, Kinney MV, Lawn JE, Kerber KJ, Odubanjo MO, Bergh AM, Walker N,  
538 Weissman E, Chopra M, Black RE, Axelson H, Cohen B, Coovadia H, Diab R, Nkrumah F:  
539 Sub-Saharan Africa’s mothers, newborns, and children: how many lives could be saved with  
540 targeted health interventions? *PLoS Med* 2010, 7(6):e1000295.
- 541 7. Central Statistical Agency (CSA) [Ethiopia] and ICF Macro. *Ethiopia Demographic and*  
542 *Health Survey 2016: Key indicators*. The DHS Program ICF Rockville, Maryland, USA. and  
543 Central Statistical Agency Addis Ababa, Ethiopia; October 2016.
- 544 8. Central Statistical Agency (CSA) [Ethiopia] and ICF Macro. *Ethiopia Demographic and*  
545 *Health Survey 2011*. 2012.



- 546 9. Addis Ababa, Ethiopia, and Calverton, Maryland, USA: Central Statistical Agency and ORC  
547 Macro. 2006.
- 548 10. Central Statistical Agency (CSA) [Ethiopia] and ORC Macro. Ethiopia Demographic and  
549 Health Survey 2005.
- 550 11. Central Statistical Agency [Ethiopia] and ORC Macro. Ethiopia Demographic and Health  
551 Survey 2000. Addis Ababa, Ethiopia, and Calverton, Maryland, USA: Central Statistical  
552 Agency and ORC Macro; 2001.
- 553 12. Yifru Berhan, Asres Berhan. Review of Maternal Mortality in Ethiopia: A Story of the Past  
554 30 Years (1980-2010). Ethiop J Health Sci. 2014. to be removed or taken to replace
- 555 13. World Health Organization (WHO) & United Nations Children’s Fund (UNICEF). Building  
556 a future for women and children: The 2012 report. Countdown to 2015: Maternal, newborn &  
557 child survival. Washington DC; WHO/UNICEF, 2012.
- 558 14. UN: Technical guidance on the application of human rights based approach to the  
559 implementation of policies and programmes to reduce preventable maternal morbidity and  
560 mortality. Report of the Office of the United Nations High Commissioner for Human Rights.  
561 In.: UN Human Rights Council Twentieth session Agenda items 2 and 3; 2012.
- 562 15. Timothy Abuya, Charity Ndwiga, Julie Ritter, Lucy Kanya, Ben Bellows, Nancy Binkin and  
563 Charlotte E. Warren. The effect of a multi-component intervention on disrespect and abuse  
564 during childbirth in Kenya. BMC Pregnancy Childbirth, 2015; 15, 224.  
565 <https://doi.org/10.1186/s12884-015-0645-6>.
- 566 16. Leontine Alkema, Doris Chou, Daniel Hogan, Sanqian Zhang, Ann-Beth Moller, Alison  
567 Gemmill, Doris Ma Fat, Ties Boerma, Marleen Temmerman, Colin Mathers, Lale Say, on  
568 behalf of the United Nations Maternal Mortality Estimation Inter-Agency Group

- 569 collaborators and technical advisory group. **November 12, 2015**
- 570 [http://dx.doi.org/10.1016/S0140-6736\(15\)00838-7](http://dx.doi.org/10.1016/S0140-6736(15)00838-7),
- 571 17. Smeele, P., Kalisa, R., van Elteren, M. van Moosmalen J, van den Akker T. Birth
- 572 preparedness and complication readiness among pregnant women admitted in a rural hospital
- 573 in Rwanda. *BMC Pregnancy Childbirth* **18**, 190 (2018). [https://doi.org/10.1186/s12884-018-](https://doi.org/10.1186/s12884-018-1818-x)
- 574 1818-x
- 575 18. Mahiti et al. Women's perceptions of antenatal, delivery, and postpartum services in rural
- 576 Tanzania 2015, *Glob Health Action*, 8: 28567 - <http://dx.doi.org/10.3402/gha.v8.28567>.
- 577 19. Robert H. Nelson, *Economics as Religion. From Samuelson to Chicago and Beyond*,
- 578 University Park (Pennsylvania), Pennsylvania State University Press; 2014 [2001]: 409 p.
- 579 ISBN-978-0-271-06376-8.
- 580 20. Population Council, "Developmental Bible: Integrating HIV and Other RH Information in
- 581 the Teachings of the Ethiopian Orthodox Church," January, 2010.
- 582 21. CIA World Factbook. Ethiopia Demographics Profile. January 20, 2018.
- 583 22. MCHIP. Cultural Barriers to Seeking Maternal Health Care in Ethiopia: A Review of the
- 584 Literature. Addis Ababa: MCHIP, 2012.
- 585 23. Bola L. Solanke, Olusegun A. Oladosub, Ambrose Akinloc and Samson O. Olanisebed.
- 586 Religion as a Social Determinant of Maternal Health Care Service Utilization in Nigeria.
- 587 *African Population Studies* Vol. 29, No. 2, 2015. <http://aps.journals.ac.za> 1868.
- 588 24. Ganle JK, Kombet ML, Baatiema L. Factors influencing the use of supervised delivery
- 589 services in Garu-Tempene District, Ghana. *BMC Pregnancy Childbirth*. 2019 Apr
- 590 27;19(1):141. doi: 10.1186/s12884-019-2295-6.

- 591 25. Stephen Obeng Gyimaha,\_, Baffour K. Takyib, Isaac Addaic. Challenges to the  
592 reproductive-health needs of African women: On religion and maternal health utilization in  
593 Ghana Available online 6 January 2006.
- 594 26. Meghan A Bohren, Erin C Hunter, Heather M Munthe-Kaas, João Paulo Souza, Joshua P  
595 Vogel and A Metin Gülmezoglu. Facilitators and barriers to institution-based delivery in  
596 low- and middle-income countries: a qualitative evidence synthesis. *BMC, Reproductive*  
597 *Health* 2014, 11:71
- 598 27. Faith Based Leaders Mobilizing Communities to Save Lives of Mothers and Newborns: A  
599 Synthesis Report. [https://www.healthynewbornnetwork.org/hnn-content/uploads/Synthesis-](https://www.healthynewbornnetwork.org/hnn-content/uploads/Synthesis-Report-Religious-Leaders-Engagement-002.pdf)  
600 [Report-Religious-Leaders-Engagement-002.pdf](https://www.healthynewbornnetwork.org/hnn-content/uploads/Synthesis-Report-Religious-Leaders-Engagement-002.pdf). Accessed on Oct. 5/2019.
- 601 28. Norbert L. Vecchiato “Illness, Therapy and Change in Ethiopian Possession Cults,” *Journal*  
602 *of the International African Institute* 63, no. 2 (1993): 179.
- 603 29. Shifraw, T., et al., “A qualitative study on factors that influence women’s choice of delivery  
604 in health facilities in Addis Ababa, Ethiopia”, *BMC Pregnancy Childbirth*, 16(307), 1-6,  
605 2016.
- 606 30. Levin, Jeffrey S., and Preston L. Schiller. “Is There a Religious Factor in Health?” *Journal of*  
607 *Religion and Health*, 1987; 26(1): 9–36. JSTOR, [www.jstor.org/stable/27505900](http://www.jstor.org/stable/27505900).
- 608 31. Mekonnen MG, Yalew KN, Umer JY, Melese M. Determinants of delivery practices among  
609 Afar pastoralists of Ethiopia. *The Pan African medical journal*.2012; 13(Suppl 1).
- 610 32. Mselle LT, Kohi TW, Mvungi A, Evjen-Olsen B, Moland KM. Waiting for attention and  
611 care: birthing accounts of women in rural Tanzania who developed obstetric fistula as an  
612 outcome of labour. *BMC Pregnancy Childbirth* 2011; 11: 75.

- 613 33. Mbekenga CK, Lugina HI, Olsson P. Postpartum experiences of first-time mothers in a  
614 Tanzanian suburb. *Women Birth* 2011; 24: 24.31.
- 615 34. The United Republic of Tanzania (2009). Secondary statistical report. Dodoma: Kongwa  
616 District Council.
- 617 35. Leyva B, Nguyen AB, Allen JD, et al. Is religiosity associated with cancer screening?:  
618 Results from a national survey. *Journal of Religion and Health*. (In press.)
- 619 36. Callister LC, Khalaf I. Spirituality in childbearing women. *J Perinat Educ.*, Spring, 2010;  
620 19(2):16-24. doi: 10.1624/105812410X495514. PMID: 20498751; PMCID: PMC2866430.
- 621 37. Hiluf M, Fantahun M. Birth preparedness and complication readiness among women in  
622 Adigrat town, north Ethiopia. *Ethiop J Health Dev* 2007; 22: 14.20.
- 623 38. Markos D, Bogale D. Birth preparedness and complication readiness among women of child  
624 bearing age group in Goba woreda, Oromia region, Ethiopia. *BMC Pregnancy Childbirth*  
625 2014; 14: 282.
- 626 39. Christiana R Titaley, Cynthia L Hunter, Michael J Dibley, Peter Heywood. Why do some  
627 women still prefer traditional birth attendants and home delivery?: a qualitative study on  
628 delivery care services in West Java Province, Indonesia. *BMC Pregnancy Childbirth* 10, 43  
629 (2010). <https://doi.org/10.1186/1471-2393-10-43>.
- 630 40. Chi, P. C., et al., “A qualitative study exploring the determinants of maternal health service  
631 uptake in post-conflict Burundi and Northern Uganda”, *BMC Pregnancy Childbirth*, 15(18),  
632 1-14, 2015.
- 633 41. Gladys Reuben Mahiti, Dickson Ally Mkoka, Angwara Dennis Kiwara, Columba Kokusiima  
634 Mbekenga, Anna-Karin Hurtig & Isabel Goicolea (2015) Women's perceptions of antenatal,

- 635 delivery, and postpartum services in rural Tanzania, *Global Health Action*, 8:1, 28567, DOI:  
636 10.3402/gha.v8.28567
- 637 42. Magoma M, Requejo J, Campbell OM, Cousens S, Filippi V. High ANC coverage and low  
638 skilled attendance in a rural Tanzanian district: a case for implementing a birth plan  
639 intervention. *BMC Pregnancy Childbirth* 2010; 10: 13.
- 640 43. Malabika S, Schmid G, Larsson E, Kirenga S, De Allegri M, Newhann F, et al. Quality of  
641 antenatal care in rural southern Tanzania: a reality check. *BMC Res Notes* 2010; 3: 209.
- 642 44. Akowuah, A., et al., "Determinants of antenatal healthcare utilisation by pregnant women in  
643 the third trimester in peri-urban Ghana", *Journal of Tropical Medicine*, 1(1), 1-8, 2018.
- 644 45. Ouedraogo M, Kurji J, Abebe L, Labonte´ R, Morankar S, Bedru KH, et al. A quality  
645 assessment of Health Management Information System (HMIS) data for maternal and child  
646 health in Jimma Zone, Ethiopia. *PLoS ONE*; 11 March 2019, 14(3): e0213600.  
647 <https://doi.org/10.1371/journal.pone.0213600>.
- 648 46. Ouedraogo, M., Kurji, J., Abebe, L. et al. Utilization of key preventive measures for  
649 pregnancy complications and malaria among women in Jimma Zone, Ethiopia. *BMC Public*  
650 *Health* 19, 1443 (2019). <https://doi.org/10.1186/s12889-019-7727-8>.
- 651 47. Furaha August, Andrea B. Pembe, Edmund Kayombo, Columba Mbekenga, Pia Axemo &  
652 Elisabeth Darj (2015) Birth preparedness and complication readiness – a qualitative study  
653 among community members in rural Tanzania, *Global Health Action*, 8:1, 26922,  
654 DOI:10.3402/gha.v8.26922
- 655 48. Aragaw, A., Yigzaw, T., Tetemke, D. et al. Cultural Competence among Maternal Healthcare  
656 Providers in Bahir Dar City Administration, Northwest Ethiopia: Cross sectional Study.  
657 *BMC Pregnancy Childbirth* 15, 227 (2015). <https://doi.org/10.1186/s12884-015-0643-8>

- 658 49. Nicole Bergen, Lakew Abebe, Shifera Asfaw, Getachew Kiros, Manisha A.Kulkarni, Abebe  
659 Mamo, Sudhakar Morankar & Ronald Labonté (2019): Maternity waiting areas – serving all  
660 women? Barriers and enablers of an equity-oriented maternal health intervention in Jimma  
661 Zone, Ethiopia, *Global Public Health*; 25 March 2019.  
662 <https://doi.org/10.1080/17441692.2019.1597142>.
- 663 50. Kurji, J., Kulkarni, M.A., Lakew Abebe Gebretsadik, Muluemebet Abera Wordofa,  
664 Sudhakar Morankar, Kunuz Haji Bedru, Gebeyehu Bulcha, Kednapa Thavorn, Ronald  
665 Labonte & Monica Taljaard.. Effectiveness of upgraded maternity waiting homes and local  
666 leader training on improving institutional births: a cluster-randomized controlled trial in  
667 Jimma, Ethiopia. *BMC Public Health* **20**, 1593 (2020). [https://doi.org/10.1186/s12889-020-](https://doi.org/10.1186/s12889-020-09692-4)  
668 [09692-4](https://doi.org/10.1186/s12889-020-09692-4).
- 669 51. Biadgo A, Legesse A, Estifanos AS, et al. Quality of maternal and newborn health care in  
670 Ethiopia: a cross-sectional study. *BMC Health Serv Res*. 2021;21(1):679. Published 2021 Jul  
671 10. doi:10.1186/s12913-021-06680-1.
- 672 52. Asrese, K., Adamek, M. E., “Women’s social networks and use of institution delivery  
673 services for uncomplicated births in North West Ethiopia: A community-based case-control  
674 study”, *BMC Pregnancy Childbirth*, 17(441), 1-10, 2017.
